# Supplementary material
Source: PubMed Central journal article supplement (PMC4179282)
Supplement: NIHMS60057-supplement-Supp_Table_1.pdf [file NIHMS60057-supplement-Supp_Table_1.pdf]

## **Supplementary Note**

### *Recruitment of study subjects*

Samples of blood were obtained from healthy blood donors, patients (cases) with antibodies against Vel (anti-Vel) and first-degree relatives of these patients. All 96 samples were assigned Unique Study Numbers (USN) and the key characteristics are summarized in **Supplementary Fig. 1**. When required biological samples were obtained with informed consent and the studies were approved according to national Research Ethics regulations in Denmark, The Netherlands and UK.

| Genome Wide Association Study<br>Sentinel SNP rs1175550<br>Genotype | Concordance phenotype-<br>genotype: Yes=0, No=1; nsSNP=2 | $\Delta/\Delta$ , deletion on both alleles,<br>WT/ $\Delta$ deletion on single allele;<br>WT/M50K and WT/M50R, non<br>synonymous (ns)SNP | Vel status: negative=0; weak-<br>Test 2=1; weak-Test 3=2 | Pregnancy=1; Surgery=2;<br>Unknown=3 | Blood donor=1, Case=2, Sib of<br>case=3 | Country of sample origin | Unique Study Number (USN) |
|---------------------------------------------------------------------|----------------------------------------------------------|------------------------------------------------------------------------------------------------------------------------------------------|----------------------------------------------------------|--------------------------------------|-----------------------------------------|--------------------------|---------------------------|
| AA                                                                  | 0                                                        | $\Delta/\Delta$                                                                                                                          | 0                                                        |                                      | 1                                       | UK                       | 1                         |
| AA                                                                  | 0                                                        | $\Delta/\Delta$                                                                                                                          | 0                                                        |                                      | 1                                       | UK                       | 2                         |
| AA                                                                  | 1                                                        | WT/ $\Delta$                                                                                                                             | 0                                                        |                                      | 1                                       | UK                       | 3                         |
| AA                                                                  | 0                                                        | $\Delta/\Delta$                                                                                                                          | 0                                                        |                                      | 1                                       | UK                       | 4                         |
| AA                                                                  | 0                                                        | $\Delta/\Delta$                                                                                                                          | 0                                                        |                                      | 1                                       | UK                       | 5                         |
| AA                                                                  | 0                                                        | $\Delta/\Delta$                                                                                                                          | 0                                                        |                                      | 1                                       | UK                       | 6                         |
| AA                                                                  | 0                                                        | $\Delta/\Delta$                                                                                                                          | 0                                                        |                                      | 1                                       | UK                       | 7                         |
| AA                                                                  | 0                                                        | $\Delta/\Delta$                                                                                                                          | 0                                                        |                                      | 1                                       | UK                       | 8                         |
| AA                                                                  | 0                                                        | $\Delta/\Delta$                                                                                                                          | 0                                                        |                                      | 1                                       | UK                       | 9                         |
| AA                                                                  | 0                                                        | $\Delta/\Delta$                                                                                                                          | 0                                                        |                                      | 1                                       | UK                       | 10                        |
| AA                                                                  | 0                                                        | $\Delta/\Delta$                                                                                                                          | 0                                                        |                                      | 1                                       | UK                       | 11                        |
| AA                                                                  | 0                                                        | $\Delta/\Delta$                                                                                                                          | 0                                                        |                                      | 1                                       | UK                       | 12                        |
| AA                                                                  | 0                                                        | $\Delta/\Delta$                                                                                                                          | 0                                                        |                                      | 1                                       | UK                       | 13                        |
| AG                                                                  | 1, 2                                                     | WT/M51R                                                                                                                                  | 0                                                        |                                      | 1                                       | UK                       | 14                        |
| AA                                                                  | 0                                                        | $\Delta/\Delta$                                                                                                                          | 0                                                        |                                      | 1                                       | UK                       | 15                        |
| AA                                                                  | 1                                                        | WT/ $\Delta$                                                                                                                             | 0                                                        |                                      | 1                                       | UK                       | 16                        |
| AA                                                                  | 0                                                        | $\Delta/\Delta$                                                                                                                          | 0                                                        |                                      | 1                                       | UK                       | 17                        |
| AA                                                                  | 0                                                        | $\Delta/\Delta$                                                                                                                          | 0                                                        |                                      | 1                                       | UK                       | 18                        |
| AA                                                                  | 0                                                        | $\Delta/\Delta$                                                                                                                          | 0                                                        |                                      | 1                                       | UK                       | 19                        |
| AA                                                                  | 0                                                        | $\Delta/\Delta$                                                                                                                          | 0                                                        |                                      | 1                                       | UK                       | 20                        |
| AA                                                                  | 0                                                        | $\Delta/\Delta$                                                                                                                          | 0                                                        |                                      | 1                                       | UK                       | 21                        |
| AA                                                                  | 0                                                        | $\Delta/\Delta$                                                                                                                          | 0                                                        |                                      | 1                                       | UK                       | 22                        |
| AA                                                                  | 0                                                        | $\Delta/\Delta$                                                                                                                          | 0                                                        |                                      | 1                                       | UK                       | 23                        |
| AA                                                                  | 0                                                        | $\Delta/\Delta$                                                                                                                          | 0                                                        |                                      | 1                                       | UK                       | 24                        |
| AA                                                                  | 0                                                        | $\Delta/\Delta$                                                                                                                          | 0                                                        |                                      | 1                                       | UK                       | 25                        |

| Unique Study Number (USN) | Country of sample origin | Blood donor=1, Case=2, Sib of case=3 | Pregnancy=1; Surgery=2; Unknown=3 | Vel status: negative=0; weak-Test 2=1; weak-Test 3=2 | $\Delta/\Delta$ , deletion on both alleles, WT/ $\Delta$ deletion on single allele; WT/M50K and WT/M50R, non synonymous (ns)SNP | Concordance phenotype-genotype: Yes=0, No=1; nsSNP=2 | Genome Wide Association Study Sentinel SNP rs1175550 Genotype |
|---------------------------|--------------------------|--------------------------------------|-----------------------------------|------------------------------------------------------|---------------------------------------------------------------------------------------------------------------------------------|------------------------------------------------------|---------------------------------------------------------------|
| 26                        | UK                       | 1                                    |                                   | 0                                                    | $\Delta/\Delta$                                                                                                                 | 0                                                    | AA                                                            |
| 27                        | UK                       | 1                                    |                                   | 0                                                    | $\Delta/\Delta$                                                                                                                 | 0                                                    | AA                                                            |
| 28                        | UK                       | 1                                    |                                   | 0                                                    | $\Delta/\Delta$                                                                                                                 | 0                                                    | AA                                                            |
| 29                        | UK                       | 1                                    |                                   | 0                                                    | $\Delta/\Delta$                                                                                                                 | 0                                                    | AA                                                            |
| 30                        | UK                       | 1                                    |                                   | 0                                                    | $\Delta/\Delta$                                                                                                                 | 0                                                    | AA                                                            |
| 31                        | UK                       | 1                                    |                                   | 0                                                    | $\Delta/\Delta$                                                                                                                 | 0                                                    | AA                                                            |
| 32                        | UK                       | 1                                    |                                   | 0                                                    | $\Delta/\Delta$                                                                                                                 | 0                                                    | AA                                                            |
| 33                        | UK                       | 1                                    |                                   | 0                                                    | $\Delta/\Delta$                                                                                                                 | 0                                                    | AA                                                            |
| 34                        | UK                       | 1                                    |                                   | 0                                                    | WT/ $\Delta$                                                                                                                    | 1                                                    | AA                                                            |
| 35                        | UK                       | 1                                    |                                   | 0                                                    | $\Delta/\Delta$                                                                                                                 | 0                                                    | AA                                                            |
| 36                        | UK                       | 1                                    |                                   | 0                                                    | $\Delta/\Delta$                                                                                                                 | 0                                                    | AA                                                            |
| 37                        | UK                       | 1                                    |                                   | 0                                                    | WT/ $\Delta$                                                                                                                    | 1                                                    | AA                                                            |
| 38                        | UK                       | 1                                    |                                   | 0                                                    | $\Delta/\Delta$                                                                                                                 | 0                                                    | AA                                                            |
| 39                        | UK                       | 1                                    |                                   | 0                                                    | $\Delta/\Delta$                                                                                                                 | 0                                                    | AA                                                            |
| 40                        | UK                       | 1                                    |                                   | 0                                                    | $\Delta/\Delta$                                                                                                                 | 0                                                    | AA                                                            |
| 41                        | UK                       | 1                                    |                                   | 0                                                    | $\Delta/\Delta$                                                                                                                 | 0                                                    | AA                                                            |
| 42                        | UK                       | 1                                    |                                   | 0                                                    | $\Delta/\Delta$                                                                                                                 | 0                                                    | AA                                                            |
| 43                        | UK                       | 1                                    |                                   | 0                                                    | $\Delta/\Delta$                                                                                                                 | 0                                                    | AA                                                            |
| 44                        | UK                       | 1                                    |                                   | 1                                                    | WT/ $\Delta$                                                                                                                    | 0                                                    | AA                                                            |
| 45                        | DN                       | 1                                    |                                   | 0                                                    | $\Delta/\Delta$                                                                                                                 | 0                                                    | AA                                                            |
| 46                        | DN                       | 1                                    |                                   | 0                                                    | $\Delta/\Delta$                                                                                                                 | 0                                                    | AA                                                            |
| 47                        | DN                       | 1                                    |                                   | 0                                                    | $\Delta/\Delta$                                                                                                                 | 0                                                    | AA                                                            |
| 48                        | DN                       | 1                                    |                                   | 0                                                    | WT/ $\Delta$                                                                                                                    | 1                                                    | AA                                                            |
| 49                        | DN                       | 1                                    |                                   | 0                                                    | $\Delta/\Delta$                                                                                                                 | 0                                                    | AA                                                            |
| 50                        | DN                       | 1                                    |                                   | 0                                                    | $\Delta/\Delta$                                                                                                                 | 0                                                    | AA                                                            |

| Unique Study Number (USN) | Country of sample origin | Blood donor=1, Case=2, Sib of case=3 | Pregnancy=1; Surgery=2; Unknown=3 | Vel status: negative=0; weak-Test 2=1; weak-Test 3=2 | $\Delta/\Delta$ , deletion on both alleles, WT/ $\Delta$ deletion on single allele; WT/M50K and WT/M50R, non synonymous (ns)SNP | Concordance phenotype-genotype: Yes=0, No=1; nsSNP=2 | Genome Wide Association Study Sentinel SNP rs1175550 Genotype |
|---------------------------|--------------------------|--------------------------------------|-----------------------------------|------------------------------------------------------|---------------------------------------------------------------------------------------------------------------------------------|------------------------------------------------------|---------------------------------------------------------------|
| 51                        | NL                       | 1                                    |                                   | 0                                                    | $\Delta/\Delta$                                                                                                                 | 0                                                    | AA                                                            |
| 52                        | NL                       | 1                                    |                                   | 0                                                    | $\Delta/\Delta$                                                                                                                 | 0                                                    | AA                                                            |
| 53                        | NL                       | 2                                    | 1                                 | 0                                                    | $\Delta/\Delta$                                                                                                                 | 0                                                    | AA                                                            |
| 54                        | NL                       | 2                                    | 2                                 | 0                                                    | $\Delta/\Delta$                                                                                                                 | 0                                                    | AA                                                            |
| 55                        | NL                       | 3                                    |                                   | 0                                                    | $\Delta/\Delta$                                                                                                                 | 0                                                    | AA                                                            |
| 56                        | NL                       | 1                                    |                                   | 0                                                    | $\Delta/\Delta$                                                                                                                 | 0                                                    | AA                                                            |
| 57                        | NL                       | 2                                    | 1                                 | 0                                                    | $\Delta/\Delta$                                                                                                                 | 0                                                    | AA                                                            |
| 58                        | NL                       | 2                                    | 2                                 | 0                                                    | $\Delta/\Delta$                                                                                                                 | 0                                                    | AA                                                            |
| 59                        | NL                       | 2                                    | 2                                 | 0                                                    | $\Delta/\Delta$                                                                                                                 | 0                                                    | AA                                                            |
| 60                        | NL                       | 1                                    |                                   | 0                                                    | $\Delta/\Delta$                                                                                                                 | 0                                                    | AA                                                            |
| 61                        | NL                       | 2                                    | 2                                 | 0                                                    | $\Delta/\Delta$                                                                                                                 | 0                                                    | AA                                                            |
| 62                        | NL                       | 2                                    | 3                                 | 0                                                    | $\Delta/\Delta$                                                                                                                 | 0                                                    | AA                                                            |
| 63                        | NL                       | 2                                    | 3                                 | 0                                                    | $\Delta/\Delta$                                                                                                                 | 0                                                    | AA                                                            |
| 64                        | NL                       | 2                                    | 1                                 | 0                                                    | $\Delta/\Delta$                                                                                                                 | 0                                                    | AA                                                            |
| 65                        | NL                       | 2                                    | 3                                 | 0                                                    | $\Delta/\Delta$                                                                                                                 | 0                                                    | AA                                                            |
| 66                        | NL                       | 3                                    |                                   | 0                                                    | $\Delta/\Delta$                                                                                                                 | 0                                                    | AA                                                            |
| 67                        | NL                       | 3                                    |                                   | 0                                                    | $\Delta/\Delta$                                                                                                                 | 0                                                    | AA                                                            |
| 68                        | NL                       | 3                                    |                                   | 0                                                    | $\Delta/\Delta$                                                                                                                 | 0                                                    | AA                                                            |
| 69                        | NL                       | 2                                    | 3                                 | 0                                                    | $\Delta/\Delta$                                                                                                                 | 0                                                    | AA                                                            |
| 70                        | NL                       | 2                                    | 3                                 | 0                                                    | $\Delta/\Delta$                                                                                                                 | 0                                                    | AA                                                            |
| 71                        | NL                       | 3                                    |                                   | 0                                                    | $\Delta/\Delta$                                                                                                                 | 0                                                    | AA                                                            |
| 72                        | NL                       | 2                                    | 3                                 | 0                                                    | $\Delta/\Delta$                                                                                                                 | 0                                                    | AA                                                            |
| 73                        | NL                       | 2                                    | 3                                 | 0                                                    | $\Delta/\Delta$                                                                                                                 | 0                                                    | AA                                                            |
| 74                        | NL                       | 2                                    | 3                                 | 0                                                    | $\Delta/\Delta$                                                                                                                 | 0                                                    | AA                                                            |
| 75                        | NL                       | 2                                    | 3                                 | 0                                                    | $\Delta/\Delta$                                                                                                                 | 0                                                    | AA                                                            |

| Unique Study Number (USN) | Country of sample origin | Blood donor=1, Case=2, Sib of case=3 | Pregnancy=1; Surgery=2; Unknown=3 | Vel status: negative=0; weak-Test 2=1; weak-Test 3=2 | Δ/Δ, deletion on both alleles, WT/Δ deletion on single allele; WT/M50K and WT/M50R, non synonymous (ns)SNP | Concordance phenotype-genotype: Yes=0, No=1; nsSNP=2 | Genome Wide Association Study Sentinel SNP rs1175550 Genotype |
|---------------------------|--------------------------|--------------------------------------|-----------------------------------|------------------------------------------------------|------------------------------------------------------------------------------------------------------------|------------------------------------------------------|---------------------------------------------------------------|
| 76                        | NL                       | 1                                    |                                   | 2                                                    | <i>WT/M51K</i>                                                                                             | 0,2                                                  | AA                                                            |
| 77                        | NL                       | 1                                    |                                   | 1                                                    | WT/Δ                                                                                                       | 0                                                    | AA                                                            |
| 78                        | NL                       | 1                                    |                                   | 1                                                    | WT/Δ                                                                                                       | 0                                                    | AA                                                            |
| 79                        | NL                       | 1                                    |                                   | 1                                                    | WT/Δ                                                                                                       | 0                                                    | AA                                                            |
| 80                        | NL                       | 1                                    |                                   | 1                                                    | WT/Δ                                                                                                       | 0                                                    | AA                                                            |
| 81                        | NL                       | 1                                    |                                   | 1                                                    | WT/Δ                                                                                                       | 0                                                    | AA                                                            |
| 82                        | NL                       | 1                                    |                                   | 1                                                    | WT/Δ                                                                                                       | 0                                                    | AA                                                            |
| 83                        | NL                       | 1                                    |                                   | 1                                                    | WT/Δ                                                                                                       | 0                                                    | AA                                                            |
| 84                        | NL                       | 1                                    |                                   | 1                                                    | WT/Δ                                                                                                       | 0                                                    | AA                                                            |
| 85                        | NL                       | 1                                    |                                   | 1                                                    | WT/Δ                                                                                                       | 0                                                    | AA                                                            |
| 86                        | NL                       | 1                                    |                                   | 1                                                    | WT/Δ                                                                                                       | 0                                                    | AA                                                            |
| 87                        | NL                       | 1                                    |                                   | 1                                                    | WT/Δ                                                                                                       | 0                                                    | AA                                                            |
| 88                        | NL                       | 1                                    |                                   | 1                                                    | WT/Δ                                                                                                       | 0                                                    | AA                                                            |
| 89                        | NL                       | 1                                    |                                   | 1                                                    | WT/Δ                                                                                                       | 0                                                    | AA                                                            |
| 90                        | NL                       | 1                                    |                                   | 1                                                    | WT/Δ                                                                                                       | 0                                                    | AA                                                            |
| 91                        | NL                       | 1                                    |                                   | 1                                                    | WT/Δ                                                                                                       | 0                                                    | AA                                                            |
| 92                        | NL                       | 1                                    |                                   | 1                                                    | WT/Δ                                                                                                       | 0                                                    | AA                                                            |
| 93                        | NL                       | 1                                    |                                   | 1                                                    | WT/Δ                                                                                                       | 0                                                    | AA                                                            |
| 94                        | NL                       | 1                                    |                                   | 1                                                    | WT/Δ                                                                                                       | 0                                                    | AA                                                            |
| 95                        | NL                       | 3                                    |                                   | 1                                                    | WT/Δ                                                                                                       | 0                                                    | AA                                                            |
| 96                        | NL                       | 3                                    |                                   | 1                                                    | WT/Δ                                                                                                       | 0                                                    | AA                                                            |

**Supplementary Table 1.** Characteristics of the Vel phenotype and SMIM1 genotype of the 96 study samples. Samples are from blood donors (n=73; see **Supplementary Fig. 1**), Vel-negative clinical cases with anti-Vel (n=16) and relatives of Vel-negative clinical cases with anti-Vel (n=7) (see **Supplementary Fig. 3**). DN, Denmark; NL, The Netherlands; UK, United Kingdom. WT, wild-type indicating that one of the common SMIM1 haplotypes was observed; A and G, the major and minor allele of GWAS SNP rs1175550; M51R and M51K are the amino mutations at residue 50 of the SMIM1 protein for USN14 and USN76, respectively; M, methionine; R, arginine; K, lysine, both samples are italics. USN1-5 were exome sequenced and are in bold.
