# Supplementary material
Source: PubMed Central journal article supplement (PMC4179282)
Supplement: NIHMS60057-supplement-Supp_Table_2.pdf [file NIHMS60057-supplement-Supp_Table_2.pdf]

| Predicted GO Biological Process Function           | P-Value  | Z-Score |
|----------------------------------------------------|----------|---------|
| Hemoglobin metabolic process                       | 1.34E-16 | 8.27    |
| Erythrocyte development                            | 1.15E-09 | 6.09    |
| Heme metabolic process                             | 1.19E-09 | 6.08    |
| Heme biosynthetic process                          | 1.46E-09 | 6.05    |
| Erythrocyte differentiation                        | 1.04E-07 | 5.32    |
| Porphyrin-containing compound biosynthetic process | 2.10E-07 | 5.19    |
| Tetrapyrrole biosynthetic process                  | 2.10E-07 | 5.19    |
| Tetrapyrrole metabolic process                     | 1.55E-06 | 4.81    |
| Porphyrin-containing compound metabolic process    | 1.55E-06 | 4.81    |
| Erythrocyte homeostasis                            | 1.78E-06 | 4.78    |
| Gas transport                                      | 3.99E-06 | 4.61    |
| Iron-sulfur cluster assembly                       | 5.75E-06 | 4.54    |
| Metallo-sulfur cluster assembly                    | 5.75E-06 | 4.54    |
| Granulocyte differentiation                        | 1.18E-05 | 4.38    |

**Supplementary Table 2.** *Gene co-expression network analysis.* Principal component analysis of 77,840 human, mouse and rat Affymetrix arrays reveals that expression levels of *SMIM1* are strongly correlated with genes involved in erythrocyte formation and hemoglobin synthesis and metabolism.
