# Supplementary material
Source: PubMed Central journal article supplement (PMC4179282)
Supplement: NIHMS60057-supplement-Supp_Table_3.pdf [file NIHMS60057-supplement-Supp_Table_3.pdf]

| Exon/Intron    | Primer name                                                       | Primer sequence                                                                 | Annealing Temperature (°C) | Product size (bp) |
|----------------|-------------------------------------------------------------------|---------------------------------------------------------------------------------|----------------------------|-------------------|
| Exon 1 and 2   | SMIM1_1/2a-F                                                      | ACCTTCCGGACCAGACACCT                                                            | 69                         | 586               |
|                | SMIM1_1/2b-R                                                      | GCAGGAAGGCCCTAGGTACACA                                                          |                            |                   |
| Intron 2       | SMIM1_intron2a-F                                                  | ACCCACACAGGCTGAGGACAC                                                           | 64                         | 452               |
|                | SMIM1_intron2b-R                                                  | GGGTCTGTCGCTGACTTAACA                                                           |                            |                   |
| Exon 3         | SMIM1_3a-F                                                        | GACCTTAGTGCCCCCTCTCCTAA                                                         | 64                         | 519               |
|                | SMIM1_3b-R                                                        | GGCCCCCTAAGTGGACTGTG                                                            |                            |                   |
| Exon 3         | SMIM1_3c-F                                                        | CACCTGTTAAGTCAGGCGACA                                                           | 60                         | 445               |
|                | SMIM1_3d-R                                                        | GTTTGCTGAGCTGCTGGAC                                                             |                            |                   |
| Exon 3         | SMIM1_3e-F                                                        | CCCTTAGTGCCCCCTCTCCTA                                                           | 60                         | 399               |
|                | SMIM1_3d-R                                                        | GTTTGCTGAGCTGCTGGAC                                                             |                            |                   |
| Exon 4         | SMIM1_4a-F                                                        | ACCCGGCCACAGTCCACTTAG                                                           | 64                         | 450               |
|                | SMIM1_4b-R                                                        | GTGTGCCCAGCTGTTTGTAGGT                                                          |                            |                   |
| Intron 2       | EMSA probe sequence. SNP rs1175550 is shown in bold.              | IRDye 700-5' -<br>TATCAGGGGCTGCAGCCTAG <b>[A/G]</b><br>TTGGGCCACAATGTCCTCGT -3' |                            |                   |
| <i>smim1</i>   | Zebrafish <i>smim1</i> morpholino                                 | 5' -<br>ATATAGAGAAGACTCTTACCCAAGC-3'                                            |                            |                   |
| <i>control</i> | Zebrafish standard control oligo                                  | 5' -<br>CCTCTTACCTCAGTTACAATTTATA-3'                                            |                            |                   |
| <i>smim1</i>   | Zebrafish <i>smim1</i> RNA reverse transcription PCR primers. F/R | TGACTGACTGCAGAGCTGATG<br>GAAACTAAAAC TGGTTTGAACAAGTC                            |                            |                   |

**Supplementary Table 3.** *Primer and oligo sequences used.*
