# Supplementary material
Source: PubMed Central journal article supplement (PMC4179282)
Supplement: NIHMS60057-supplement-Supp_Table_4.pdf [file NIHMS60057-supplement-Supp_Table_4.pdf]

| Type of progenitor cells          | Acronym | Monoclonal antibodies against     |
|-----------------------------------|---------|-----------------------------------|
| Hematopoietic Stem Cells          | HSC     | Lin- CD34+ CD38- CD90+ CD45RA-    |
| MultiPotent Progenitors           | MPP     | Lin- CD34+CD38-CD90-CD45RA-       |
| Common Lymphoid Progenitors       | CLP     | Lin- CD34+CD38+CD10+CD45RA+       |
| Common Myeloid Progenitors        | CMP     | Lin- CD34+CD38+IL-3Ra low CD45RA- |
| Granulocyte Macrophage Precursor  | GMP     | Lin- CD34+CD38+IL-3Ra+CD45RA+     |
| Megakaryocyte Erythroid Precursor | MEP     | Lin- CD34+CD38+IL-3Ra- CD45RA-    |
| Megakaryocyte                     | MK      | CD34- CD235a- CD41+ CD42b+        |
| Erythroblast                      | EB      | CD36+ CD71+ CD235a+               |

**Supplementary Table 4.** *Antibodies used for sorting of hematopoietic cells.* Monoclonal antibodies used to sort progenitor/precursor cells from cord blood or to characterise megakaryocytes and erythroblasts obtained by culture of CD34+ hematopoietic cord blood stem cells.
